# Supplementary material for: Nesting Success and Nesting Height in the Critically Endangered Medium Tree Finch (Camarhynchus pauper)
Source: MDPI journal article supplement (doi:10.3390/birds2040032), 2021-12-04
Supplement: s1 [file s1]

Archive with 1 entries (1 files):
- birds-1354289-supplementary.pdf
