# Supplementary material for: Nesting Success and Nesting Height in the Critically Endangered Medium Tree Finch (Camarhynchus pauper)
Source: MDPI journal article supplement (doi:10.3390/birds2040032), 2021-12-04
Supplement: s1 [file s1 › birds-1354289-supplementary.pdf]

## Supplementary Material

# No Safe Nesting Height in the Critically Endangered Medium Tree Finch (*Camarhynchus pauper*): Most Offspring Killed by Avian Vampire Flies and Nest Predators

Sonia Kleindorfer<sup>1,2</sup>, Lauren K. Common<sup>1</sup>, Petra Sumasgutner<sup>2</sup><sup>1</sup> College of Science and Engineering, Flinders University, Adelaide, 5001, Australia<sup>2</sup> Konrad Lorenz Research Center, Core Facility for Behaviour and Cognition and Department of Behavioural and Cognitive Biology, University of Vienna, Grünau/Almtal, 4645, Austria

**Table S1.** Sample size of monitored Medium Tree Finch (*Camarhynchus pauper*) nests on Floreana Island, Galápagos archipelago, per year.

| Study year | Nest monitored |
|------------|----------------|
| 2004       | 5              |
| 2006       | 33             |
| 2008       | 45             |
| 2010       | 51             |
| 2012       | 33             |
| 2013       | 12             |
| 2014       | 9              |
| 2020       | 34             |
| Total      | 222            |

**Table S2a.** Global model for probability of mortality of Medium Tree Finch (*Camarhynchus pauper*) nests on Floreana Island, Galápagos archipelago, between 2004 and 2020, in dependency of male age (estimated by coloration) in interaction with nest height, study year and annual sum of rain. The response variable was measured as a binary variable (0 = at least one nestling fledged, 1 = nest failed) and fitted with a binomial model with logit function;  $n = 107$  records (11 complete nest successes, 12 partial successes, 84 total nest failures).

|                        | Estimate | SE     | z-value | X <sup>2</sup> | P-value |
|------------------------|----------|--------|---------|----------------|---------|
| (Intercept)            | 81.47    | 129.75 | 0.63    |                | 0.530   |
| Nest height            | -0.58    | 0.39   | -1.47   | 2.32           | 0.127   |
| Male age               | -1.14    | 0.81   | -1.41   | 2.11           | 0.146   |
| Rain                   | 0.0018   | 0.0014 | 1.31    | 1.73           | 0.189   |
| Year                   | -0.04    | 0.06   | -0.58   | 0.33           | 0.563   |
| Nest height x Male age | 0.12     | 0.11   | 1.16    | 1.37           | 0.241   |

**Table S2b.** Backward reduced effect table for probability of mortality comparing models by deviance and Akaike information criterion corrected for small sample sizes (AICc). For mortality, the null model was the minimal adequate model, but all model candidates were ranked within ( $\Delta\text{AICc} < 2$ ); therefore, all predictors were kept in the final model.

| Global model: glm(mortality ~ nest height * male age + rain + year, family=binomial(logit)) |            |          |       |
|---------------------------------------------------------------------------------------------|------------|----------|-------|
| Predictor                                                                                   | Eliminated | Deviance | AICc  |
| (none)                                                                                      | 0          | 86.30    | 98.30 |
| Rain                                                                                        | 0          | 88.03    | 98.03 |
| Year                                                                                        | 0          | 86.64    | 96.64 |
| Nest height x Male age                                                                      | 0          | 87.67    | 97.68 |

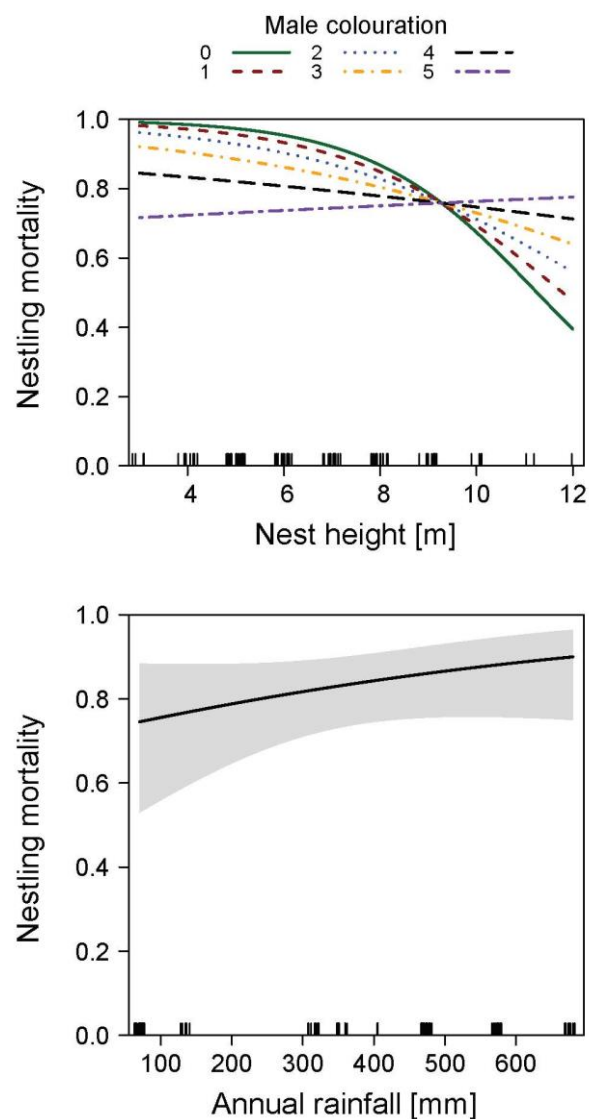

**Figure S1.** Relationship (statistically not significant) between mortality and (a) male age (estimated by coloration) in interaction with nest height; and, (b) annual sum of rain in Medium Tree Finch (*Camarhynchus pauper*) nests on Floreana Island, Galápagos Archipelago, between 2004 and 2020. Results show predicted line of binomial model with logit function with 95% CIs, tick marks on x-axis reflect sample size, model details in Table S2a. Note that the y-axis 'nestling mortality' ranges from '0' = no mortality (all or some chicks fledged successfully) to '1' = full mortality (no chicks fledged).

**Table S3.** Height (m) of Medium Tree Finch (*Camarhynchus pauper*) nests on Floreana Island, Galápagos Archipelago, between 2004 and 2020, in dependency of annual sum of rain;  $n = 191$ ).

|             | <b>Estimate</b> | <b>SE</b> | <b>t-value</b> | <b>F-value</b> | <b>P-value</b> |
|-------------|-----------------|-----------|----------------|----------------|----------------|
| (Intercept) | 7.42            | 0.29      | 25.65          | 657.82         | <0.001         |
| Rain        | -0.0020         | 0.0007    | -3.00          | 9.01           | 0.003          |

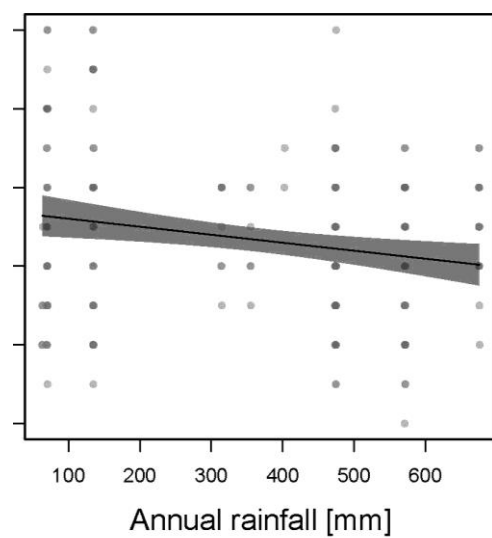

**Figure S2.** Relationship between nesting height annual sum of rain in Medium Tree Finches (*Camarhynchus pauper*) on Floreana Island, Galápagos Archipelago, between 2004 and 2020. Results show predicted line of linear model with 95% CIs and raw data in background scatter, model details in Table S3.
